# Supplementary material for: Arm rehabilitation in post stroke subjects: A randomized controlled trial on the efficacy of myoelectrically driven FES applied in a task-oriented approach
Source: PLoS One. 2017 Dec 4;12(12):e0188642. doi: 10.1371/journal.pone.0188642 (PMC5714329; doi:10.1371/journal.pone.0188642)
Supplement: S1 Dataset — (XLS) [file pone.0188642.s003.xls]

## Sheet: Sheet1
ID	Rehab Centre	Randomizzation group	Stroke type (I=Ischemic, E=Hemorrhagic, I+E=mixed)	Chronicity (SA=Sub Acute, CR-Chronic)	Stroke site (C=Cortical, S=Subcortical, C+S, B=brain stem)	ARAT Pre (T0)	ARAT (T1)	ARAT (T2)	ARAT Post (T3)	FMA (T0)	FMA (T3)	FMA FU (T4)	DASH (T0)	DASH (T3)	DASH (T4)	SEX	Evaluation Date (T0)	Evaluation Date (T1)	Evaluation Date (T2)	Evaluation Date (T3)	Evaluation Date (T4)
ID1	SMN	M-TOT	I+E	CR	S	8	18	18	22	33	37	49	71.5	55	27.5	F	40634	40651	40662	40681	40728
ID10	SMN	C-TOT	I	SA	C+S	14	21	27	30	51	50	NA	66	60.5	NA	M	40751	40778	40791	NA	NA
ID100	SMN	M-TOT	I	SA	S	4	7	16	15	29	50	NA	45.4545	38.6364	NA	F	41803	41824	41841	41850	NA
ID101	SMN	C-TOT	I	SA	C+S	0	0	0	0	6	6	4	54.5455	29.5455	31.8182	F	41900	41915	41933	41964	42030
ID12	Palazzolo	C-TOT	I	SA	C+S	3	3	NA	3	2	8	9	52	43	37	M	40875	40889	NA	40924	40952
ID13	SMN	M-TOT	E	SA	S	0	11	15	20	6	40	51	70.4545	50	52.2727	M	40947	40966	40980	40987	41022
ID14	SMN	M-TOT	I	SA	C+S	23	29	31	30	45	50	NA	25	38	NA	M	40949	40963	40980	40989	NA
ID15	SMN	C-TOT	I	CR	C+S	0	0	0	0	6	7	6	52.2727	65.9091	77.2727	F	40935	40949	40975	40998	41047
ID16	Palazzolo	M-TOT	I	SA	S	3	3	3	2	22	35	34	61	56	35	F	40973	40987	41005	41017	41053
ID17	Palazzolo	C-TOT	I	SA	C+S	35	35	36	36	49	54	53	16	15	37	F	40952	40973	40982	40996	41029
ID18	Palazzolo	C-TOT	I	SA	S	9	18	42	44	53	58	62	40	17	13	F	40989	41005	41017	41031	41066
ID19	Palazzolo	C-TOT	E	CR	C	40	NA	NA	42	63	66	61	54	56	31	F	40875	NA	NA	40924	40952
ID2	SMN	C-TOT	I	SA	?	4	3	4	6	12	15	NA	38.5	16.5	NA	F	40683	40700	40711	40723	NA
ID20	Palazzolo	C-TOT	E	CR	S	41	41	41	43	45	45	45	66	61	16	M	41052	41066	41080	41092	41141
ID21	SMN	M-TOT	I	SA	C+S	15	23	33	39	45	59	60	68	71	66	F	41075	41089	41101	41115	41171
ID22	SMN	M-TOT	E	CR	C+S	28	31	29	30	52	55	56	18.1818	29.5455	47.7273	F	40980	40996	41017	41036	41101
ID23	Palazzolo	M-TOT	I	CR	S	18	28	31	32	40	40	NA	26	25	NA	M	41212	41228	41241	41263	NA
ID24	SMN	M-TOT	I	CR	C+S	0	0	0	2	8	12	12	77.2727	72.7273	75	M	41089	41101	41110	41117	NA
ID26	SMN	C-TOT	I	SA	?	4	6	NA	7	20	33	49	56.8182	56.8182	34.0909	F	41117	NA	NA	41155	NA
ID28	SMN	M-TOT	I	SA	S	1	0	0	0	10	5	NA	74.25	79.75	NA	M	41327	NA	NA	41383	NA
ID29	SMN	M-TOT	I	SA	S	26	29	31	32	41	55	53	60.5	34.0909	38.6364	F	41430	41439	41449	41460	NA
ID3	SMN	M-TOT	I	SA	S	10	25	29	27	27	42	49	82.5	79.75	55	M	40711	40731	40743	40752	40802
ID31	Palazzolo	C-TOT	I	SA	C+S	29	31	37	39	44	54	NA	27	28	NA	F	41495	41506	41516	41539	NA
ID32	Palazzolo	C-TOT	I	CR	C+S	37	38	38	37	49	48	51	21	7	4	M	41059	41078	41092	41109	41153
ID33	SMN	C-TOT	E	SA	S	14	NA	23	27	45	53	NA	75	75	NA	F	41429	41442	NA	41451	NA
ID34	Rovato	C-TOT	I	CR	C	38	43	43	44	55	61	61	22.7	11.4	9.1	F	41511	41519	41529	41541	NA
ID35	Rovato	M-TOT	E	CR	T	41	42	43	45	64	64	64	63.6	50	47.7	F	41541	41550	41562	41575	NA
ID36	Rovato	M-TOT	I	CR	C	40	41	42	42	61	61	62	59.1	56.81	52.7	F	41542	41551	41563	41576	NA
ID37	Rovato	M-TOT	I	CR	T	42	42	42	42	60	60	NA	56.8	56.8	NA	F	41577	41590	41600	41610	NA
ID38	Rovato	C-TOT	I	SA	C	36	42	43	45	52	66	66	59.1	31.8	31.8	M	41512	41522	41530	41543	41583
ID4	SMN	M-TOT	I	SA	C	16	21	24	23	32	38	32	66	71.5	41.25	M	40710	40735	40744	40752	40812
ID40	Rovato	C-TOT	I	CR	C+S	20	26	30	34	45	52	43	56.8	47.7	54.5	F	41499	41509	41521	41536	41603
ID41	Rovato	M-TOT	i	CR	C+S	45	45	45	45	64	66	66	45.5	36.4	36.4	M	41550	41569	41583	41596	41628
ID42	Rovato	M-TOT	I	SA	C	45	45	45	45	60	62	62	47.73	36.36	29.54	F	41543	41554	41564	41577	41613
ID44	Rovato	C-TOT	I	SA	T	45	45	45	45	63	66	66	35	11	11	M	41380	41393	41404	41417	NA
ID46	Rovato	M-TOT	I	SA	C	0	12	18	18	21	26	26	65.01	54	54.54	F	41453	NA	NA	41487	NA
ID47	SMN	C-TOT	E	SA	C	0	0	0	0	10	14	NA	70.4545	56.8182	NA	F	41304	NA	NA	41344	NA
ID48	Rovato	C-TOT	I	SA	S	2	3	4	4	14	16	16	43	41	68.18	M	41550	NA	41571	41583	NA
ID5	SMN	C-TOT	I	SA	S	0	0	3	3	5	23	17	68.1818	54.5455	52.2727	M	40870	40883	40896	40917	40961
ID51	Rovato	C-TOT	I	CR	S	31	36	38	38	43	48	NA	70.5	52.3	NA	M	41591	41600	41612	41626	NA
ID52	Rovato	C-TOT	I	SA	T	2	5	5	4	31	31	NA	40	65.9	NA	M	41591	41600	41612	41626	NA
ID55	Roma	M-TOT	I	CR	S	32	34	37	37	36	55	55	61.3636	47.7273	47.7273	M	41697	41718	41729	41740	NA
ID56	Roma	M-TOT	I	CR	S	0	0	0	0	13	13	13	77.2727	72.7273	72.7273	M	41780	41796	41810	41822	NA
ID57	Roma	M-TOT	E	SA	T	30	30	42	39	38	53	NA	45.4545	56.8182	NA	M	41813	41831	41848	41862	NA
ID58	Roma	M-TOT	E	SA	C+S	0	0	0	0	7	10	NA	63.6364	63.6364	NA	M	41813	41830	41849	41863	NA
ID59	Roma	M-TOT	I	SA	C	0	0	0	15	11	29	NA	81.8182	70.4545	NA	F	41817	41835	41850	41864	NA
ID6	SMN	M-TOT	I	SA	C+S	0	0	0	0	6	13	18	86.3636	90.9091	84.0909	F	40863	40905	40884	40898	40946
ID60	Roma	M-TOT	I	CR	C+S	0	0	0	0	17	18	NA	56.8182	61.3636	NA	F	41815	41834	41849	41859	NA
ID61	Roma	M-TOT	I	CR	C+S	0	0	0	0	8	8	8	61.3636	50	50	F	41827	41887	41897	41908	NA
ID63	Roma	C-TOT	I	SA	C+S	2	5	10	16	16	36	NA	68.1818	47.7273	NA	F	41695	41719	41730	41743	NA
ID64	Roma	C-TOT	I	SA	C+S	0	1	0	0	8	8	8	63.6364	61.3636	45.4545	F	41780	41796	41810	41822	NA
ID66	Roma	C-TOT	I	SA	C+S	0	0	0	0	7	7	7	81.8182	77.2727	81.8182	F	41806	41822	41834	41844	NA
ID67	Roma	C-TOT	I	SA	C	30	30	30	43	43	47	NA	47.7273	34.0909	NA	F	41817	41829	41841	41851	NA
ID69	Roma	C-TOT	E	CR	C	0	0	4	4	9	11	15	54.5455	54.5455	68.1818	M	41898	41922	41941	41960	NA
ID7	SMN	C-TOT	I	SA	S	30	32	39	41	50	48	57	77	60.5	60.5	M	40732	40744	40753	40779	40849
ID70	Roma	M-TOT	I	SA	C+S	4	4	4	4	19	22	33	70.4545	63.6364	70.4545	F	41934	41955	41967	41978	NA
ID71	Roma	C-TOT	I	SA	C+S	0	0	0	0	16	18	NA	63.6364	63.6364	NA	M	41934	41948	41962	41975	NA
ID72	Roma	M-TOT	I	SA	T	0	0	0	4	21	28	28	59.0909	56.8182	56.8182	F	41934	41950	41962	41974	NA
ID73	Roma	M-TOT	I	CR	C+S	0	0	2	2	4	13	NA	84.0909	79.5455	NA	F	41921	41934	41946	41956	NA
ID75	SMN	C-TOT	I	SA	S	0	0	0	0	6	14	11	56.8182	52.2727	38.6364	F	41906	41919	41933	41953	42030
ID8	SMN	M-TOT	I	SA	S	13	NA	33	41	31	59	63	34.0909	15.9091	27.2727	F	40893	NA	40923	40931	40975
ID9	SMN	C-TOT	E	CR	C+S	12	10	12	9	29	27	27	22.7273	18.1818	NA	F	40917	NA	40942	40952	41010
ID43	Rovato	M-TOT	I	SA	C	0	DO	DO	DO	8	DO	DO	75	DO	DO	M	41378	DO	DO	DO	DO
ID68	Roma	C-TOT	I	SA	C+S	0	0	DO	DO	6	DO	DO	63.6364	DO	DO	F	41879	41892	DO	DO	DO
ID39	SMN	C-TOT	E	SA	S	0	0	0	DO	4	DO	DO	70.4545	NA	NA	M	41521	NA	NA	NA	DO
ID65	Roma	C-TOT	E	CR	C	12	18	DO	DO	41	DO	DO	56.8182	DO	DO	M	41759	41773	DO	DO	DO
ID25	SMN	C-TOT	I	SA	C+S	13	23	DO	DO	41	DO	DO	61.3636	DO	DO	M	41119	NA	NA	NA	DO
ID11	SMN	M-TOT	I+E	SA	S	3	22	36	DO	26	DO	DO	22	DO	DO	M	40751	40760	40781	NA	NA
ID27	Palazzolo	M-TOT	I	SA	S	0	DO	DO	DO	DO	DO	DO	29	DO	DO	M	41114	DO	DO	DO	DO
ID62	Roma	M-TOT	E	SA	S	0	0	DO	DO	4	DO	DO	70.4545	DO	DO	F	41827	41835	DO	DO	DO
ID30	Palazzolo	C-TOT	I	SA	C+S	DO	DO	DO	DO	DO	DO	DO	DO	DO	DO	M	DO	DO	DO	DO	DO
ID53	Palazzolo	C-TOT	I	SA	C	DO	DO	DO	DO	DO	DO	DO	DO	DO	DO	F	DO	DO	DO	DO	DO
ID54	Rovato	M-TOT	I	CR	S	DO	DO	DO	DO	DO	DO	DO	DO	DO	DO	M	DO	DO	DO	DO	DO
ID49	Rovato	C-TOT	E	CR	C+S	DO	DO	DO	DO	DO	DO	DO	DO	DO	DO	M	DO	DO	DO	DO	DO
ID45	Rovato	M-TOT	I	SA	C+S	DO	DO	DO	DO	DO	DO	DO	DO	DO	DO	F	DO	DO	DO	DO	DO
ID102	Roma	M-TOT	I	SA	T	0	0	2	2	10	12	NA	79	70	NA	M	|21-lug-15|	|31-lug-15|	|12-ago-15|	|24-ago-15|	.
ID104	Roma	C-TOT	I	SA	C+S	0	0	2	2	14	15	NA	64	61	NA	F	|10-ago-15|	|26-ago-15|	|07-set-15|	|17-set-15|
ID105	Roma	C-TOT	I	SA	S	4	4	4	5	33	36	36	55	55	NA	F	|10-ago-15|	|26-ago-15|	|07-set-15|	|17-set-15|	.
ID106	Roma	C-TOT	I	SA	C	45	45	45	45	51	55	55	NA	NA	NA	M	|02-set-15|	|16-set-15|	|28-set-15|	|08-ott-15|	.
ID108	Roma	C-TOT	I	SA	C+S	0	DO	DO	DO	4	DO	DO	DO	DO	DO	M	|02-set-15|	DO	DO	DO	DO
ID107	Roma	C-TOT	I	SA	C+S	0	0	0	0	10	14	14	NA	NA	NA	M	|29-ago-15|	|09-set-15|	|21-set-15|	|01-ott-15|	.
ID109	Roma	C-TOT	E	SA	C	15	15	17	25	40	47	47	14	14	NA	M	|29-ago-15|	|09-set-15|	|21-set-15|	|01-ott-15|	.
